# Supplementary material for: Qualitative development and content validation of the “SPART” model; a focused ethnography study of observable diagnostic and therapeutic activities in the emergency medical services care process
Source: BMC Emerg Med. 2021 Nov 13;21:135. doi: 10.1186/s12873-021-00526-z (PMC8590330; doi:10.1186/s12873-021-00526-z)
Supplement: Supplementary file 3 — Additional file 3:. “Groundedness” and frequency tables SPART codes. [file 12873_2021_526_MOESM3_ESM.xlsx]

## Sheet: Anamnesis group
Color	Name	Groundedness	Density	Groups
●	anamnesis	323	10	Anamnesis group
●	anamnesis-actual status	64	1	Anamnesis group
●	anamnesis-allergies	23	1	Anamnesis group
●	anamnesis-consent question	3	1	Anamnesis group
●	anamnesis-documentation	43	1	Anamnesis group
●	anamnesis-general information	67	1	Anamnesis group
●	anamnesis-medical history	91	1	Anamnesis group
●	anamnesis-medication	51	1	Anamnesis group
●	anamnesis-pain score	8	1	Anamnesis group
●	anamnesis-treatment restrictions	10	1	Anamnesis group

## Sheet: Assessment group
Color	Name	Groundedness	Density	Groups
●	assesment-ENT inspection	4	1	Assessment group
●	assesment-respiratory system	62	1	Assessment group
●	assesment-temperature	8	1	Assessment group
●	assessment	276	12	Assessment group
●	assessment-airway	4	1	Assessment group
●	assessment-circulatory system	81	1	Assessment group
●	assessment-dental inspection	1	1	Assessment group
●	assessment-EKG	67	1	Assessment group
●	assessment-general status	40	1	Assessment group
●	assessment-neurologic system	54	1	Assessment group
●	assessment-painscore	11	1	Assessment group
●	assessment-POC bloodtest	14	1	Assessment group

## Sheet: Others group
Color	Name	Groundedness	Density	Groups
●	others	156	0	Others group
●	others-consultation external infomation sources	6	0	Others group
●	others-dispatch communication	16	0	Others group
●	others-GP consultation	4	0	Others group
●	others-information/instruction patient/family	112	0	Others group
●	others-non medical professional consultation	1	0	Others group
●	others-other medical professional consultation	5	0	Others group
●	others-team communication	52	0	Others group

## Sheet: Presentation group
Color	Name	Groundedness	Density	Groups
●	presentation	210	8	Presentation group
●	presentation-assessment	48	1	Presentation group
●	presentation-demand for care	3	1	Presentation group
●	presentation-early treatment/transfer decision	1	1	Presentation group
●	presentation-GP verbal handover	4	1	Presentation group
●	presentation-GP written handover	3	1	Presentation group
●	presentation-observation	24	1	Presentation group
●	presentation-questioning	144	1	Presentation group

## Sheet: Prologue group
Color	Name	Groundedness	Density	Groups
●	prologue	146	3	Prologue group
●	proloque-observation	4	1	Prologue group
●	proloque-questioning	138	1	Prologue group

## Sheet: Reasoning group
Color	Name	Groundedness	Density	Groups
●	reasoning	206	1	Reasoning group

## Sheet: Resolution group
Color	Name	Groundedness	Density	Groups
●	resolution	32	4	Resolution group
●	resolution-handover others healthcare provider	3	1	Resolution group
●	resolution-hospitalisation	24	1	Resolution group
●	resolution-stay home	3	1	Resolution group

## Sheet: Situation group
Color	Name	Groundedness	Density	Groups
●	situation	28	6	Situation group
●	situation-bystander information	2	1	Situation group
●	situation-first look patient (PAT)	22	1	Situation group
●	situation-interpreting the scene	3	1	Situation group
●	situation-professional handover	1	1	Situation group
●	situation-reading the accident	2	1	Situation group

## Sheet: Start group
Color	Name	Groundedness	Density	Groups
●	start	154	6	Start group
●	start-hypothesis generaton	23	1	Start group
●	start-PAP	47	1	Start group
●	start-PAP-gloves	7	1	Start group
●	start-prearrival treatment/transfer decision	9	1	Start group
●	start-reading medical information	58	1	Start group

## Sheet: Transfer group
Color	Name	Groundedness	Density	Groups
●	transfer	43	6	Transfer group
●	transfer-physical-EMS	2	1	Transfer group
●	transfer-physical-hospital	17	1	Transfer group
●	transfer-physical-patient	4	1	Transfer group
●	transfer-telephone-hospital	18	1	Transfer group
●	transfer-written-GP	1	1	Transfer group

[truncated: 1 more sheets: Treatment group]
